1 **Superantigens promote *Staphylococcus aureus* bloodstream infection**  
2 **by eliciting pathogenic interferon-gamma (IFN $\gamma$ ) production that**  
3 **subverts macrophage function**

4

5 **Stephen W. Tuffs<sup>1</sup>, Mariya I. Goncheva<sup>1</sup>, Stacey X. Xu<sup>1</sup>, Heather C. Craig<sup>1</sup>, Katherine**  
6 **J. Kasper<sup>1</sup>, Joshua Choi<sup>1</sup>, Ronald S. Flannagan<sup>1</sup>, Steven M. Kerfoot<sup>1</sup>, David E.**  
7 **Heinrichs<sup>1</sup> and John K. McCormick<sup>1,2\*</sup>.**

8

9 <sup>1</sup>Department of Microbiology and Immunology, University of Western Ontario, London,  
10 Ontario, Canada

11 <sup>2</sup>Lawson Health Research Institute, London, Ontario, Canada

12 \*For correspondence. Email [john.mccormick@uwo.ca](mailto:john.mccormick@uwo.ca); Tel. (519) 661 3309; Fax (519)  
13 661 3499.

14

15 Running Title: Superantigens promote pathogenic IFN $\gamma$  production

16

17 **Keywords:** *Staphylococcus aureus*, Superantigen, Interferon-gamma, Macrophage

18 ABSTRACT

19 *Staphylococcus aureus* is a foremost bacterial pathogen responsible for a vast array of human  
20 diseases. Staphylococcal superantigens (SAGs) constitute a family of potent exotoxins secreted  
21 by *S. aureus*, and SAg genes are found ubiquitously in human isolates. SAGs bind directly to MHC  
22 class II molecules and T cell receptors, driving extensive T cell activation and cytokine release.  
23 Although these toxins have been implicated in serious disease including toxic shock syndrome,  
24 we aimed to further elucidate the mechanisms by which SAGs contribute to staphylococcal  
25 pathogenesis during septic bloodstream infections. As most conventional mouse strains respond  
26 poorly to staphylococcal SAGs, we utilized transgenic mice encoding humanized MHC class II  
27 molecules (HLA-DR4) as these animals are much more susceptible to SAg activity. Herein, we  
28 demonstrate that SAGs contribute to the severity of *S. aureus* bacteremia by increasing bacterial  
29 burden, most notably in the liver. We established that *S. aureus* bloodstream infection severity is  
30 mediated by CD4+ T cells and interferon-gamma (IFN $\gamma$ ) is produced to very high levels during  
31 infection in a SAg-dependent manner. Bacterial burden and disease severity were reduced by  
32 antibody blocking of IFN $\gamma$ , phenocopying isogenic SAg deletion mutant strains. Additionally,  
33 cytokine analysis demonstrated that the immune system was skewed towards a proinflammatory  
34 response that was reduced by IFN $\gamma$  blocking. Infection kinetics and flow cytometry analyses  
35 suggested this was a macrophage driven mechanism, which was confirmed through macrophage  
36 depletion experiments. Further validation with human leukocytes indicated that excessive IFN $\gamma$   
37 allowed *S. aureus* to replicate at a higher rate within macrophages. Together, this suggests that  
38 SAGs promote *S. aureus* survival by manipulating immune responses that would otherwise be  
39 effective at clearing *S. aureus*. This work implicates SAg toxins as critical targets for preventing  
40 persistent or severe *S. aureus* disease.

41

42 **Word count: 286**

## 43 INTRODUCTION

44 *Staphylococcus aureus* is an important bacterial pathogen that primarily exists as a harmless  
45 commensal. Yet, once primary barriers have been breached, this pathobiont also has the  
46 propensity to cause an extraordinary range of superficial, invasive, and toxin-mediated diseases  
47 (Tong et al., 2015). This spectrum of disease can range from relatively simple soft tissue infection,  
48 to pneumonia or bacteremia that may lead to life-threatening sepsis (Kwiecinski and Horswill,  
49 2020; Tong et al., 2015). *S. aureus* is one of the most common causes of sepsis and carries a  
50 high mortality rate of 20-40% and mortality rates can double in the context of septic shock (Corl  
51 et al., 2020; Kwiecinski and Horswill, 2020). Wide-spread drug resistance, including both hospital  
52 and community-associated methicillin-resistant *S. aureus* (MRSA), has further exacerbated  
53 treatment challenges with this important pathogen (Turner et al., 2019).

54 Key to the success of *S. aureus* as a pathogen is a vast array of virulence factors encoded  
55 both within the chromosome and on mobile genetic elements. These factors fall into several  
56 functional classes including: adhesion factors (e.g. fibronectin-binding proteins A and B [FnbpA  
57 and FnbpB]) (Foster et al., 2014; Josse et al., 2017), immunomodulatory proteins (e.g.  
58 Staphylococcal protein A [Spa] or Chemotaxis inhibitor protein of *Staphylococcus* [CHIPS])  
59 (Koymans et al., 2017), cytolytic toxins (e.g. Alpha-hemolysin [Hla] (Alonzo and Torres, 2014;  
60 Berube and Wardenburg, 2013)) and superantigens (SAg). The SAg family in *S. aureus* consists  
61 of at least 26 different paralogues that function by cross-linking major histocompatibility complex  
62 (MHC) class II molecules with the variable region of the T cell receptor (TCR)  $\beta$ -chain ( $V\beta$ ); the  
63 unconventional interaction with these two key immune receptors occur irrespective of the cognate  
64 antigen and results in the aberrant and widespread activation of T cells followed by  
65 proinflammatory cytokine release (Tuffs et al., 2018).

66 SAGs are the etiological agent of toxic shock syndrome where T cell activation caused by  
67 SAGs released from *S. aureus* triggers a systemic 'cytokine storm' that can lead to hypotension  
68 and multiple organ failure, and in some cases death. SAg activity has also been implicated in a  
69 number of other serious diseases including endocarditis, pneumonia and bacteremia (Spaulding  
70 et al., 2013). Historically, it has been difficult to model the biological functions of SAg activity *in*  
71 *vivo* as conventional murine strains are highly insensitive to these toxins. As a result, much of the  
72 pathogenesis work related to SAGs has been performed in rabbits (Salgado-Pabón et al., 2013;  
73 Tuffs et al., 2017; Wilson et al., 2011). Importantly, we have demonstrated that transgenic mice  
74 expressing the human leukocyte antigen (HLA)-DR4 are significantly more sensitive to SAg  
75 activity (Xu et al., 2015, 2014). This allowed us to determine that staphylococcal SAGs are

76 important during bloodstream infections and also identified the liver as a key target for these  
77 factors (Xu et al., 2014).

78 In the current study, we deployed targeted antibody depletion protocols that demonstrated,  
79 during bloodstream infection, SAGs target CD4<sup>+</sup> T cells to produce pathogenic levels of the key  
80 cytokine interferon-gamma (IFN $\gamma$ ). IFN $\gamma$  promoted enhanced disease severity and bacterial  
81 burden in the liver and excess IFN $\gamma$  levels during infection appeared to perturb liver macrophage  
82 activity to promote the survival of *S. aureus* within these cells. This the first report of targeted SAg  
83 activity that manipulates host macrophages to support *S. aureus* growth during bloodstream  
84 infections.

85

## 86 RESULTS

87 **Transgenic HLA-DR4 C57BL/6 mice are sensitive to SAGs SEB and SEC and can model *S.***  
88 ***aureus* bacteremia.** Previously, we demonstrated that *S. aureus* burden is promoted during  
89 murine bloodstream infections by the SAGs staphylococcal enterotoxin A (SEA) and  
90 staphylococcal enterotoxin-like W (SEIW); however, the mechanism remained uncharacterized  
91 (Vrieling et al., 2020; Xu et al., 2014). In the current study, we first utilized strain COL, a well-  
92 studied methicillin resistant *S. aureus* (MRSA) isolate from clonal complex (CC) 8 that produces  
93 the SAg, staphylococcal enterotoxin B (SEB). Splenocyte analysis from C57BL/6 (B6) or  
94 transgenic HLA-DR4 C57BL/6 (DR4-B6) animals, identified that T cell activation (measured by  
95 the production of IL-2) to titrating doses of SEB was orders of magnitude higher from spleen cells  
96 from the DR4-B6 animals compared with conventional B6 mice (Fig 1A). In addition, analysis of  
97 stimulated splenocytes using cytometry analysis demonstrated a massive expansion of V $\beta$ 8<sup>+</sup> T  
98 cells, the major target of SEB in mice (Rellahan et al., 1990) (Fig 1B). These cells represent ~20%  
99 of the T cell repertoire in the DR4-B6 animals and the majority of these were activated by SEB as  
100 measured by the upregulation of CD25 (Fig 1B). Together these data demonstrate that, compared  
101 to conventional B6 mice, DR4-B6 mice are highly sensitive to SEB and can be used for the  
102 analysis of SEB activity *in vivo*.

103 To determine if SEB contributes to pathogenicity in murine bacteremia, we infected B6  
104 and DR4-B6 animals with *S. aureus* COL. We found that wild-type *S. aureus* COL was significantly  
105 more virulent in DR4-B6 mice with higher bacterial burden found in the liver and kidneys when  
106 compared to the B6 background (Fig 1C). This was due to SEB activity as the bacterial burden of  
107 the SEB-null mutant (COL  $\Delta$ seb) essentially phenocopied the data obtained from the B6 animals.

108 Importantly, this phenotype could be complemented with COL  $\Delta$ *seb* containing pCM29::*seb* (Fig  
109 1C and 1D). These data clearly demonstrate that SEB contributes to the pathogenicity of *S.*  
110 *aureus* COL during bloodstream infection.

111 To determine if additional SAGs other than SEB could also contribute to bacteremia, we  
112 expanded our analysis to include *S. aureus* MW2, a CC1 MRSA isolate that produces  
113 staphylococcal enterotoxin C (SEC) (King et al., 2016). SEC is phylogenetically similar to SEB,  
114 and has a similar V $\beta$  activation profile in humans (King et al., 2016; Tuffs et al., 2018). We  
115 successfully deleted the SEC gene in *S. aureus* MW2 and were able to complement the gene *in*  
116 *trans* (Fig S1). Like *S. aureus* COL, we found a significant increase in bacterial burden in the liver  
117 and kidney in DR4-B6 animals compared to the B6 mice when infected with MW2 (Fig 1E).  
118 Furthermore, deletion of *sec* from MW2 resulted in a significant reduction in bacterial burden and  
119 liver pathology (Fig 1E & Fig 1F). These data indicate that both SEB and SEC, produced from  
120 different *S. aureus* backgrounds, can contribute to the pathogenesis of experimental bloodstream  
121 infection and that SAG-sensitive DR4-B6 mice are suitable for modelling SAG activity in the context  
122 of live *S. aureus* infection.

123

124 **Depletion of CD4<sup>+</sup> T cells results in reduced bacterial burden in the liver of *S. aureus***  
125 **infected DR4-B6 mice.** It has been well-established that SAGs can target and activate different  
126 T cell subsets that express the appropriate TCR V $\beta$  (Tuffs et al., 2018). For efficient  
127 nasopharyngeal infection, *Streptococcus pyogenes* required the expression of the SAG  
128 streptococcal pyrogenic exotoxin A (SpeA) (Kasper et al., 2014), and depletion of T cells resulted  
129 in a markedly reduced bacterial burden which phenocopied the deletion of the *speA* gene (Zeppa  
130 et al., 2017). In the current study, we used this T cell depletion strategy and applied it to our model  
131 of *S. aureus* bacteremia. We found that when CD4<sup>+</sup> T cells were depleted, bacterial burden in the  
132 liver was significantly reduced, with a near complete reduction of visible lesions, while depletion  
133 of CD8<sup>+</sup> T cells had no impact (Fig 2A). To reduce bacterial burden in the kidney, depletion of  
134 CD4<sup>+</sup> T cells was not sufficient, and required the combined depletion CD4<sup>+</sup> and CD8<sup>+</sup> T cells to  
135 observe a phenotype, suggesting a limited role for CD8<sup>+</sup> cells in this organ (Fig 2B). To determine  
136 if this effect was limited to conventional CD4<sup>+</sup> T cells, we also depleted NK and iNKT cells using  
137 an anti-NK1.1 targeting antibody, according to a previously established protocol (Szabo et al.,  
138 2017a). In this case, there was no impact on bacterial burden or animal morbidity indicating these  
139 cells likely do not play a role in this infection model (Fig S2). Together these data indicate that

140 bacterial burden in the liver during *S. aureus* bacteremia is promoted by the activity of  
141 conventional CD4+ T cells, likely due to activation by SEB.

142

143 **Blocking of IFN $\gamma$  activity during systemic *S. aureus* infection results in reduced disease**  
144 **severity and bacterial burden.** Previous analyses have demonstrated that CD4+ T cells can be  
145 targeted by staphylococcal SAGs to result in the release of numerous cytokines, including the key  
146 cytokines interferon-gamma (IFN $\gamma$ ) (also known as type II interferon), interleukin-10 (IL-10) and  
147 IL-17A (Tuffs et al., 2018). These cytokines have antagonistic activity to each other (Naundorf et  
148 al., 2009; Xu and Cao, 2010), and in the case of IL-17A and IFN $\gamma$ , have been shown to contribute  
149 to SEB-mediated morbidity during toxemia models in HLA-transgenic mice (Szabo et al., 2017b;  
150 Tilahun et al., 2011). Together, this suggests that these key cytokines may contribute to SAG-  
151 mediated pathogenesis. To test this hypothesis, we used antibody depletion to block cytokine  
152 activity during bloodstream infection by both *S. aureus* COL and MW2 (Fig 3A). We found that  
153 only blocking of IFN $\gamma$  resulted in a significant reduction in bacterial burden and liver pathology in  
154 the liver that phenocopied the deletion of *seb* or *sec* in *S. aureus* COL and MW2, respectively  
155 (Fig 3B and Fig 3E). Depletion of either IL-10 or IL-17A had limited impact on the liver burden  
156 suggesting that these cytokines do not promote bacterial burden in this model. Depletion of IFN $\gamma$   
157 also resulted in lower bacterial burden in the kidneys, suggesting that the blocking of this cytokine  
158 reduced the overall severity of this infection (Fig 3C and Fig 3F). It was also noted that bacterial  
159 burden in the kidney increased once IL-17A was depleted, but only for *S. aureus* COL. This  
160 suggests that IL-17A is important for protection against kidney damage during bloodstream  
161 infection by *S. aureus* in the HLA-transgenic mouse model. Overall, these data indicate that, of  
162 the three cytokines tested, only IFN $\gamma$  promoted *S. aureus* burden during a bloodstream infection.

163

164 **Superantigens drive pathogenic production of IFN $\gamma$  during *S. aureus* bloodstream**  
165 **infection.** Several approaches were taken to determine if the promotion of bacterial burden by  
166 IFN $\gamma$  was mediated by the SAG toxins. First, we performed cytokine analysis on liver homogenates  
167 and serum from animals infected with the wild-type or the SAG deletion mutants at 24 hours post  
168 infection (hpi). Compared to wild-type *S. aureus* COL infected mice, IFN $\gamma$  levels were ~10-fold  
169 lower in livers from animals infected with *S. aureus* COL  $\Delta$ *seb* (Fig 4A). There was also a clear  
170 trend for more IFN $\gamma$  in the serum for animals that were infected with the wild-type, although this  
171 did not reach statistical significance (Fig 4A).

172           Following from the cytokine analysis, we modified our infection model to characterise IFN $\gamma$   
173 depletion under circumstances where the SEB SAg from *S. aureus* COL was either absent or  
174 unable to function. In the SAg insensitive C57BL/6 background, bacterial recovery from infected  
175 mice was at a similarly low levels regardless of whether they had been treated with the IFN $\gamma$   
176 depletion antibody or isotype control, suggesting this phenotype can only be observed in a SAg  
177 sensitive environment (Fig 4B). Indeed, when we repeated the IFN $\gamma$  depletion in the DR4-B6  
178 background and included the COL  $\Delta seb$  construct, bacteria recovered from organs of the isotype  
179 or IFN $\gamma$  depleted groups were similarly low, whereas wild-type infections treated with the isotype  
180 control antibody produced visible liver lesions and higher bacterial counts in both the liver and  
181 kidney (Fig 4B). These data demonstrate that a functioning *seb* gene is required to promote  
182 pathogenic IFN $\gamma$  activity.

183           Finally, to establish the link between SEB and IFN $\gamma$ , we aimed to determine if the addition  
184 of exogenous IFN $\gamma$  could functionally complement the deletion of *seb* in *S. aureus* COL. In this  
185 experiment, animals were administered two 20  $\mu$ g treatments of recombinant IFN $\gamma$  1 h prior to  
186 infection and 1 h after. Treatment with exogenous IFN $\gamma$  resulted in a ~2-log increase in bacterial  
187 burden in the liver when compared to the vehicle control (Fig 4C). Curiously, very few lesions  
188 formed on the surface of the liver with this approach, suggesting that sustained SAg/IFN $\gamma$  activity  
189 is required for this pathology to become evident (Fig 4C). This demonstrates that the stimulation  
190 of pathogenic IFN $\gamma$  is a key function of SEB during bloodstream infection and taken together with  
191 the previous data suggests a functional SAg must be present to elicit pathogenic production of  
192 IFN $\gamma$ .

193

194 **IFN $\gamma$  promotes early bacterial survival during *S. aureus* infection.** With it established that  
195 SAGs could drive the production of pathogenic levels of IFN $\gamma$ , we next wanted to determine when  
196 IFN $\gamma$  had the most impact during the disease course. We therefore determined bacterial burden  
197 at shorter timepoints (i.e. 2 hpi, 8hpi, 12 hpi, 24 hpi, 36 hpi) in animals treated with  $\alpha$ IFN $\gamma$   
198 antibodies or the isotype control (Fig 5A). From these data, much of the infectious dose became  
199 trapped within the liver following tail vein injection with  $\sim 2 \times 10^6$  CFU (approx. 40% of dose) at 2  
200 hpi and this was followed by rapid clearance between 2 and 8 hpi in both groups. At 12 hpi the  
201 rate of bacterial clearance was reduced in the  $\alpha$ IFN $\gamma$  treated animals but continued steadily with  
202 almost complete clearance of the bacteria by 96 hpi. Conversely, after 24 hpi, in the livers of  
203 isotype treated, bacterial burden rapidly expanded reaching a level 3-logs higher by 96 hpi (Fig  
204 5A). We performed a repeat of this analysis with daily timepoints and were able to confirm the



205 trajectories that were observed in the shorter time-course (Fig S3). Together, these data indicate  
206 that IFN $\gamma$  produced during wild-type infections by *S. aureus* is contributing to the ability of the  
207 bacteria to avoid clearance by the immune system in the liver during the early stages of  
208 bloodstream infection.

209

210 **Proinflammatory signalling is delayed and less intense when IFN $\gamma$  is blocked during**  
211 **sepsis.** IFN $\gamma$  is a pleiotropic cytokine in the immune system and its depletion during infection  
212 could impact numerous downstream signalling pathways during the response to *S. aureus*  
213 bloodstream infection. In isotype treated mice, the highest level of IFN $\gamma$  was observed in the liver  
214 between 12 and 24 hpi, in excess of 500 pg/ml (Fig 5B). Additionally, we confirmed that  $\alpha$ IFN $\gamma$   
215 antibodies were able to reduce IFN $\gamma$  concentration during infection up to 36 hpi (Fig 5B). We also  
216 analyzed serum samples for aspartate aminotransferase (AST) levels as a proxy for liver damage.  
217 These data indicate that there was limited change in liver damage during infection irrespective of  
218 IFN $\gamma$  levels; however, there did appear to be a faster drop in AST levels in the IFN $\gamma$  depleted  
219 groups in the later timepoints (Fig 5C), congruent with the reduced bacterial burden (Fig 5A).

220 To gain a broader understanding of the cytokine and chemokine dynamics, liver  
221 homogenates were analysed by multiplex cytokine array over the course of the experiment. This  
222 demonstrated that in earlier timepoints (2-12 hpi), many signalling molecules associated with  
223 inflammation were upregulated during infection where IFN $\gamma$  was produced at high levels (Fig 5D).  
224 Strikingly, between 24 and 36 hpi, many cytokines and chemokines became reduced relative to  
225 the group treated with  $\alpha$ IFN $\gamma$  antibodies, which directly correlated with the expansion of *S. aureus*  
226 (Fig 5A) and was subsequently reversed again by 96 hpi (Fig 5D), suggesting that an inflammatory  
227 environment favourable to bacterial proliferation is sustained for a longer period during an  
228 infection where IFN $\gamma$  production is high. Together, we infer that pathogenic production of IFN $\gamma$   
229 results in the rapid production of a pro-inflammatory environment in the liver that contributes to *S.*  
230 *aureus* survival during bloodstream infection.

231

232 **Macrophage activity in the liver is subverted by SAg-elicited IFN $\gamma$  production.** Immune cells  
233 such as macrophages and neutrophils are critical for clearance of *S. aureus* during infection  
234 (Pidwill et al., 2021; Spaan et al., 2013). The cytokine and chemokine analysis indicated that wild-  
235 type *S. aureus* infection in HLA-DR4 mice drives an IFN $\gamma$ -dependent pro-inflammatory signalling  
236 cascade in the livers of animals (Fig 5D). To determine if this response had any impact on the



237 phagocytic cell populations in the liver, we first phenotyped immune cells isolated from this organ  
238 using flow cytometry at 24 and 96 hpi infection with *S. aureus* COL (see Fig S4 for gating strategy).  
239 We found few differences between the IFN $\gamma$ -depleted or control mice in terms of the resident  
240 macrophages (Kupffer cells) (Fig 6A). For both monocytes and neutrophils, there were trends  
241 towards a higher percentage of these cells at 24 hpi in the isotype treated group, however, neither  
242 reached significance (Fig 6A). For neutrophils, this had subsided to a similar level in both groups  
243 by 96 hpi whereas monocytes had decreased in both groups by 96 hpi but there were significantly  
244 less in the IFN $\gamma$ -depleted group at this time. We did detect significantly higher inflammatory  
245 macrophages in the IFN $\gamma$ -depleted mice at 24 hpi although these were equivalent by 96 hpi (Fig  
246 6A).

247 The infection kinetics (Fig 5A) and flow cytometry (Fig 6A) analysis suggest that the  
248 presence of high levels of IFN $\gamma$  could impact the activity, recruitment, or differentiation of  
249 phagocytes, most likely inflammatory macrophages. To determine if these cells are the target of  
250 pathogenic IFN $\gamma$  production, we depleted macrophages in mice using clodronate containing  
251 liposomes (Clodrosome®) and then performed *S. aureus* COL bloodstream infections with or  
252 without IFN $\gamma$  blocking antibodies (Fig 6B). Macrophage depletion had an impact on animal  
253 welfare, so endpoints were brought forward from 96 hpi to 72 hpi and bacterial burden was  
254 determined in both the kidneys and the liver. In the liver, we again observed at 24 hpi, in animals  
255 treated with the control liposomes, that IFN $\gamma$  depletion resulted in higher bacterial burden (Fig  
256 6C). However, when we compared macrophage depleted animals the phenotype observed  
257 between the IFN $\gamma$  depletion and isotype groups was abolished, indicating that macrophages are  
258 likely driving the IFN $\gamma$ -dependent phenotype. We also observed an increase in bacterial burden  
259 when macrophages were depleted, compared to animals treated with control liposomes and  
260 isotype antibody (Fig 6C) indicating that these cells were important to restrict bacterial growth in  
261 the liver at this timepoint. In the kidneys, there was evidence that the depletion of macrophages  
262 likely resulted in greater bacterial 'seeding' to this organ although there was no difference due to  
263 IFN $\gamma$  depletion (Fig 6C). The data from the 72 hpi timepoint confirmed the observation that  
264 macrophages were driving the IFN $\gamma$  phenotype as again we were able to observe a clear IFN $\gamma$   
265 phenotype in both kidney and liver, yet this phenotype was mitigated by macrophage depletion  
266 (6D). Together, these data demonstrate that the promotion of *S. aureus* burden by IFN $\gamma$  during  
267 bloodstream infection is mediated by macrophages.

268

269 **High levels of IFN $\gamma$  allow for increased intracellular replication of *S. aureus* inside human**  
270 **macrophages.** To determine if pathogenic IFN $\gamma$  had any impact in the human system, white blood  
271 cells from healthy human donors were analysed for their responses to SAGs and IFN $\gamma$ . First, we  
272 wanted to confirm that SAGs can elicit IFN $\gamma$  from T cells through the engagement of the TCR. To  
273 do this, we compared IFN $\gamma$  production elicited by recombinant SEB protein compared to the site  
274 directed mutant SEB-N23A. This mutant features a mutation within the TCR binding pocket  
275 resulting in a much lower ability to engage the TCR of its target cells (Leder et al., 1998). As  
276 expected, SEB-N23A elicited significantly lower IFN $\gamma$  from human PBMC compared with wild-type  
277 SEB (Fig 7A). This confirmed that to elicit IFN $\gamma$  from human PBMC, SEB must engage and  
278 activate the T cell through binding the TCR.

279 Next, we wanted to establish that our experimental strains (i.e. COL and MW2) could elicit  
280 IFN $\gamma$  production from human T cells. We stimulated human PBMCs with a titration of wild-type  
281 bacterial supernatants grown for 8 h in brain heart infusion (BHI) broth and included supernatants  
282 from the respective SAG deletion and complemented strains. The data clearly indicated that both  
283 SEB and SEC, produced from COL and MW2 respectively, could drive IFN $\gamma$  production in human  
284 PBMCs. The deletion of *seb* in COL eliminated the production of IFN $\gamma$ , while there was a  
285 significant decline in the potency of MW2  $\Delta$ *sec*. The remaining IFN $\gamma$  production was still easily  
286 detectable at lower MW2  $\Delta$ *sec* supernatant dilutions suggesting that other SAGs encoded by MW2  
287 (i.e. *sea*, *selh*, *selk*, *sell*, *selq*, *selw* and *selx*) are also able to elicit the production of this cytokine.

288 As the murine model indicted macrophages are likely the major target of SAG-induced  
289 IFN $\gamma$ , we infected human monocyte-derived macrophages with *S. aureus* and dosed these cells  
290 with varying concentrations of recombinant human IFN $\gamma$  (Fig 7D). For both *S. aureus* COL and  
291 MW2, we saw an overall increase in intracellular bacterial replication when macrophages were  
292 dosed with high levels of IFN $\gamma$  (Fig 7E and 7F). This phenotype was most evident with MW2 as  
293 this strain seems to have an improved ability at replicating inside macrophages. Moreover,  
294 replication was enhanced when IFN $\gamma$  levels were high, with a nearly 2-log increase in bacterial  
295 burden when infected macrophages were treated with 500ng/ml of IFN $\gamma$  (Fig 7F). Notably, the  
296 high concentrations of IFN $\gamma$  did not impact macrophage viability and the bacteria were not simply  
297 overgrowing dead macrophages (Fig S5). Together, these data indicate that SAG-induced, IFN $\gamma$ -  
298 mediated subversion of macrophages can occur in the human system, and that this mechanism  
299 appears to impair the ability of macrophages to kill intracellular *S. aureus*.

300

301 DISCUSSION

302 Bloodstream infections caused by *S. aureus* represent a significant challenge in the clinic and  
303 SAGs have been shown to play a clear role in this disease (reviewed in Kwiecinski and Horswill,  
304 2020; Spaulding et al., 2013). However, until now it has remained unclear how SAGs promote *S.*  
305 *aureus* persistence during infection (especially in the liver) and, specifically, how these toxins  
306 manipulate the response (Tuffs et al., 2018). The weak activity of SAGs in murine models has  
307 been a serious challenge in understanding how these toxins promote bacterial burden during  
308 infection. While rabbits are more sensitive to these toxins and may be more physiologically  
309 appropriate, challenges include both cost and the availability of advanced immunological tools  
310 (Salgado-Pabón and Schlievert, 2014). By using this HLA-transgenic mouse model, we can now  
311 examine the impact of the SAG-mediated cytokine response during *S. aureus* disease. By  
312 demonstrating that IFN $\gamma$  can be promoted to pathogenic levels by the SAGs SEB and SEC, we  
313 provide the first report of a key cytokine produced in response to SAG-mediated T cell activation,  
314 that dramatically promotes bacterial burden during a systemic infection. This adds to a growing  
315 body of literature that demonstrates these toxins function to subvert different components of the  
316 immune system and challenges the waning dogma that these proteins are produced by the  
317 bacterium simply as an 'immunological smoke screen' (for a recent review discussing this see  
318 Tuffs et al. 2018).

319 The pathogenic potential of IFN $\gamma$  has been alluded to in other studies. Firstly, a model of  
320 wound infection indicated that *S. aureus* capsular polysaccharide was shown to elicit IFN $\gamma$  which  
321 led to an increased recruitment of neutrophils (McLoughlin et al., 2008). The authors postulated  
322 that higher neutrophil recruitment increased pathogenesis, as *S. aureus* was able to avoid  
323 neutrophil killing and survive intracellularly (McLoughlin et al., 2008). Our cytokine/chemokine  
324 data are consistent with these findings (Fig 5D), and while neutrophils were trending towards  
325 lower recruitment in the IFN $\gamma$  depleted group at 24 hpi (Fig 6A), it appeared to be monocytes and  
326 inflammatory macrophages, rather than neutrophils in the isotype group that were favourably  
327 recruited to the liver by 96 hpi (Fig 6A). This variation in immune cell recruitment could promote  
328 a niche for the bacteria to reside within in the liver. Furthermore, our data also indicated IFN $\gamma$   
329 drove an increased production of the chemokine, fractalkine (CX3CL1), which has been  
330 suggested to be able to skew liver macrophages towards a more suppressive state (Aoyama et  
331 al., 2010). Added to this, high level of IFN $\gamma$  itself was able to induce apoptosis and affect the life  
332 cycle of hepatocytes which can contribute to sustained inflammation in this organ (Horras et al.,  
333 2011). Together these observations, both in this study and others, suggest that SAGs through

334 forcing the overproduction of IFN $\gamma$  can modulate the liver environment to create a niche that is  
335 favourable for *S. aureus* survival.

336 The liver is an important organ during bacteremia as circulating pathogens are frequently  
337 filtered and trapped by resident macrophages (Kupffer cells) (Surewaard et al., 2016). In addition,  
338 there have been several reports that demonstrate *S. aureus* has evolved strategies to prevent  
339 this from occurring, including direct resistance to phagocytic killing by macrophages, or through  
340 the release of Hla that can aggregate platelets to create ischemic areas in the liver and promote  
341 further bacterial growth (Surewaard et al., 2016, 2018). It is important for the bacteria to establish  
342 in the liver as bacteria surviving here can eventually seed other organs, such as the kidney (Jorch  
343 et al., 2019; Surewaard et al., 2016).

344 Given the pleotropic nature of IFN $\gamma$ , it is not surprising that several mechanisms may be  
345 at play in the liver to promote the growth of *S. aureus*. In addition to the other potential  
346 mechanisms of action defined in other studies, we have revealed a new pathway where  
347 macrophages are a clear target of pathogenic levels of IFN $\gamma$ . To our knowledge, this is the first  
348 time that macrophage activity has been shown to be affected by high concentration of this cytokine  
349 to support intracellular replication of *S. aureus*. Of particular interest were the differences noted  
350 between the two *S. aureus* strains, while MW2 had the replicative ability to respond to IFN $\gamma$   
351 concentrations in a dose dependent manner, the same was not true for COL which featured  
352 considerable noise (Fig 7). Overall, these data suggest that COL as an isolate is not suited to  
353 replication within macrophages and may rely on another IFN $\gamma$  driven mechanisms during these  
354 types of infections.

355 Our findings could also appear to be somewhat contradictory to several other studies that  
356 clearly demonstrate that IFN $\gamma$  contributes to the clearance of *S. aureus* during bloodstream  
357 infection (Brown et al., 2015; Zhao et al., 1998). Furthermore, the activity of memory CD4<sup>+</sup> T cells  
358 supports the clearance of *S. aureus* by producing this cytokine along with other signals to  
359 coordinate this response (Brown et al., 2015). These studies were conducted in conventional  
360 mouse strains that are less vulnerable to the activity of staphylococcal SAg and are more likely to  
361 represent what would occur in an immunocompetent individual, that is able to neutralise toxins  
362 like the SAg. Indeed, this divergence is well presented by Brown et al. (2015), as in this study  
363 the IFN $\gamma$  profiles of previously *S. aureus* exposed mice, demonstrate that this cytokine peaks  
364 almost immediately after infection and subsequently drops rapidly. For mice that were not pre-  
365 exposed to *S. aureus*, IFN $\gamma$  was barely detected (Brown et al., 2015). This is contrary to what we  
366 have observed in SAg-mediated disease as IFN $\gamma$  peaked later (24 hpi) and stayed high for much

367 of the infection course. Together this suggests that IFN $\gamma$  has a dual role during infection, primarily  
368 it is protective against *S. aureus* but if manipulated to high and sustained levels, can act as a  
369 mediator that promotes pathogenesis.

370 The implications of pathogenic IFN $\gamma$  production in human health are significant. As  
371 discussed, *S. aureus* is one of the most common causes of bloodstream infection with disease  
372 often leading to life-threatening sepsis (Kwiecinski and Horswill, 2020). Indeed, sepsis is a very  
373 serious concern in the clinic, contributing to nearly 20% of global annual deaths (Rudd et al.,  
374 2020). One of the major challenges to treating sepsis is that without early intervention this disease  
375 can rapidly move from a microbiologically-mediated condition to an immunologically-driven  
376 sequela, often resulting in antibiotic treatment being ineffective (Corl et al., 2020). The  
377 pathophysiology of sepsis has also proven to be highly complex with many factors including the  
378 invading pathogen contributing to outcome. Death as an outcome of sepsis can occur both  
379 through acute inflammatory processes that leads to multi-organ failure as well as chronic  
380 immunosuppressive activity (Van Der Slikke et al., 2020). In both cases, IFN $\gamma$  can contribute to  
381 these outcomes as a key promoter of the proinflammatory response, or due to its absence leading  
382 to the dominance of immunosuppressive pathways (Hotchkiss et al., 2013; Romero et al., 2010).  
383 Indeed, several studies have demonstrated that once a patient enters the immunosuppressive  
384 state of sepsis, therapy with IFN $\gamma$  may actually improve outcomes, however, the opposite maybe  
385 true if administered too early (Nalos et al., 2012; Payen et al., 2019).

386 There is also evidence to suggest this mechanism may be at play in the context of *S.*  
387 *aureus* vaccines and could be an important consideration for vaccine design. Karauzum *et al*  
388 (2017) found that whole cell vaccines in mice promoted disease and bacterial survival, through  
389 the activity of a heavily skewed Th1 immune response. It appeared in this bloodstream infection  
390 model that disease was promoted by the vaccines and this was mediated by excessive production  
391 of IFN $\gamma$  (Karauzum et al., 2017). It was also suggested that this study had significant parallels  
392 with the failure of a clinical trial using the IsdB subunit vaccine, which was intended to protect  
393 against bacteremia, but instead had to be terminated early as it worsened patient outcome  
394 (Fowler et al., 2013; Karauzum et al., 2017). Together this would suggest that *S. aureus* has  
395 evolved to take advantage of a human immune system whose responses have been skewed by  
396 the activity of IFN $\gamma$  and further to this, evolved a family of toxins capable of driving this skewing  
397 itself.

398 In conclusion, we report the discovery that *S. aureus* SAGs, SEB and SEC, can drive the  
399 production of IFN $\gamma$  during bloodstream infection to promote disease. Our analyses suggest that

400 that the pathogenic production of IFN $\gamma$  subverts macrophage activity allowing the bacterium to  
401 persist within the liver leading to increase morbidity. Furthermore, we were able to establish this  
402 mechanism has implications for human health as IFN $\gamma$  can promote bacterial intracellular  
403 replication in human macrophages. Together this moves forward our understanding of the  
404 immunological factors at play during *S. aureus*-mediated sepsis in the context of pathogen-driven  
405 inflammation and can inform on appropriate design of treatments and vaccines targeting *S.*  
406 *aureus* disease.

407

#### 408 ACKNOWLEDGEMENTS

409 This work was supported by an operating grant from the Canadian Institutes of Health Research  
410 (CIHR) (PJT-166050) to S.W.T and J.K.M. D.E.H acknowledges funding from CIHR grant PJT-  
411 153308. Figure 3A, 6B and 7D were created in part using Biorender.com.

412

#### 413 AUTHOR CONTRIBUTIONS SECTION

414 S.W.T executed the majority of the experimental work assisted by M.I.G, S.X.X, H.C.C, K.J.K, J.  
415 C. and D.E.H. Experimental design and data interpretation were performed by S.W.T, M.I.G,  
416 S.M.K, R.S.F, D.E.H, and J.K.M. S.W.T and J.K.M conceptualized the study and wrote the  
417 manuscript, which was reviewed and approved by all co-authors.

418

#### 419 DECLARATION OF INTERESTS

420 The authors declare no competing interests.

421

#### 422 FIGURE LEGENDS

423 **Figure 1 – Superantigens SEB and SEC are important in *S. aureus* bacteremia when**  
424 **performed in transgenic HLA-DR4 C57BL/6 animals.** (A) IL-2 production of isolated  
425 splenocytes from conventional C57BL/6 (open dots) and transgenic DR4-B6 (solid dots) mice  
426 following stimulation with a titration of SEB protein. (B) Activation of V $\beta$ 8<sup>+</sup> T cells in DR4-B6 mice  
427 stimulated by SEB compared to the no-protein control as determined by CD25 expression  
428 (Quarter values represent total cell population). C57BL/6 and DR4-tg animals were inoculated



429 intravenously (i.v.) with  $5 \times 10^6$  CFUs and then sacrificed at 96 hpi for *S. aureus* COL (C-D) and 72  
430 hpi for *S. aureus* MW2 (E-F). Liver and kidney bacterial burden (C&E) was assessed in  
431 conventional B6 mice (open dots) or in transgenic DR4-B6 mice (solid dots). Each dot represents  
432 an individual mouse, and the bar indicates the geometric mean. Significant differences were  
433 determined using the Kruskal-Wallis test with uncorrected Dunn's test for multiple comparisons (\*  
434  $p < 0.05$ , \*\*  $p < 0.01$ , \*\*\*  $p < 0.001$ , \*\*\*\*  $p < 0.0001$ ). Representative livers from the infected mice  
435 from *S. aureus* COL and mutants (D) and *S. aureus* MW2 mutants (F), white arrows indicate the  
436 presence of liver lesions.

437

438 **Figure 2 – CD4+ T cells promote bacterial burden during *S. aureus* bloodstream infection.**

439 *In vivo* T cell depletion in DR4-B6 mice was performed with monoclonal antibodies to deplete  
440 CD4+ (clone GK1.5) and/or CD8+ (clone YTS169.4) cells prior to i.v. infection of *S. aureus* COL.  
441 *In vivo* liver bacterial burden and pathology (A), and kidney bacterial burden (B) was assessed 96  
442 hpi. Each data point represents an individual mouse, and the bar indicates the geometric mean  
443 for CFUs/organ, and the median for lesions/organ. Significant differences were determined using  
444 the Kruskal-Wallis test with uncorrected Dunn's test for multiple comparisons (\*  $p < 0.05$ , \*\*  $p <$   
445  $0.01$ ).

446

447 **Figure 3 – IFN $\gamma$  promotes liver abscess formation and bacterial burden during *S. aureus***

448 **bacteremia in DR4-B6 mice.** (A) Schematic outlining *in vivo* cytokine depletion with monoclonal  
449 antibodies prior to i.v. infection of DR4-B6 mice. Bacterial burden and abscess formation in liver  
450 (B&E) and kidney (C&F) at 96 hpi for *S. aureus* COL (B&C) or 72 hpi for *S. aureus* MW2 (E&F).  
451 Each dot represents an individual mouse, and the bar represents the geometric mean for  
452 CFUs/organ, and the median for lesions/organ. Significant differences were determined using the  
453 Kruskal-Wallis test with uncorrected Dunn's test for multiple comparisons (\*  $p < 0.05$ , \*\*  $p < 0.01$ ).  
454 Representative livers from the cytokine treated mice from *S. aureus* COL (D) and *S. aureus* MW2  
455 (F).

456

457 **Figure 4 – Superantigens promote pathogenic production of IFN $\gamma$  that support bacterial**

458 **burden.** (A) DR4-B6 mice were inoculated i.v. with wild-type *S. aureus* COL or the COL  $\Delta$ *seb*  
459 deletion strain. At 24 hpi animals were sacrificed and livers and blood were harvested, and



460 material was prepared for IFN $\gamma$  analysis. Each dot represents an individual mouse, the bar  
461 indicates the geometric mean, and error bars indicate the standard deviation. Dotted line indicated  
462 the levels detected in an uninfected animal. (B) C57BL/6 and DR4-B6 mice were treated 18 h  
463 prior to infection each animal was treated with 250  $\mu$ g of isotype or  $\alpha$ IFN $\gamma$  antibody administered  
464 by i.p. injection. Animals were infected i.v. with *S. aureus* wild-type COL. (C) DR4-B6 animals  
465 were treated with 20 $\mu$ g (40 $\mu$ g total) of recombinant murine IFN $\gamma$  or vehicle control (100  $\mu$ l PBS)  
466 i.p. 2h before and 1h after i.v. infection with *S. aureus* COL  $\Delta$ seb. In both experiments (B & C) *in*  
467 *vivo* bacterial burden was assessed after 96 h in liver and kidneys and an assessment of gross  
468 pathological liver lesions was also performed. Each dot represents an individual mouse, and the  
469 bar indicates the geometric mean for CFUs/organ, and the median for lesions/organ. Significant  
470 differences were determined using the Mann-Whitney test (A, B & D) or Kruskal-Wallis test with  
471 uncorrected Dunn's test for multiple comparisons (C) (\* p < 0.05, \*\* p < 0.01, \*\*\*p < 0.001 \*\*\*\*p  
472 <0.0001).

473

474 **Figure 5 – SAg induced IFN $\gamma$  promotes a pro-inflammatory environment that allows *S.***  
475 ***aureus* to avoid complete clearance during bloodstream infection.** Animals were treated with  
476 isotype or depleting IFN $\gamma$  antibodies 18 h prior to infection with *S. aureus* COL. Following infection  
477 3-4 animals were sacrificed from each group at the 6 timepoints shown, and liver and blood were  
478 harvested from each animal. Bacterial burden was determined at each timepoint and is shown as  
479 mean CFU/liver  $\pm$  SEM (A). Liver homogenate was analysed by multiplex cytokine array and mean  
480 IFN $\gamma$  (pg/ml)  $\pm$  SEM at each timepoint were determined for each timepoint (B). Serum was  
481 analysed by ELISA to determine the concentration of Aspartate transaminase (AST), data shown  
482 are mean AST (pg/ml)  $\pm$  SEM (C). Multiplex cytokine/chemokine array analysis was conducted  
483 on liver homogenate recovered from each animal sacrificed during the time-course (D). Data  
484 shown represent the log<sub>10</sub> fold change for each cytokine between isotype and IFN $\gamma$  depleted  
485 groups that displayed significant differences by students T test. Prior to comparison data was  
486 normalized to an antibody treated, uninfected animal sacrificed at the same timepoint as their  
487 comparator. Blue color (i.e. positive values) indicates more cytokine/chemokine is produced in  
488 the isotype infection and red color (i.e. negative values) indicates more cytokine/chemokine is  
489 produced in the IFN $\gamma$  depleted infection. Broad classification for each cytokine is indicated, as  
490 well as potential binding partners for chemokines.

491

492 **Figure 6 – Liver macrophages are the target of pathogenic IFN $\gamma$  production.** (A) Flow  
493 cytometry-based phenotyping of immune cells isolate from livers infected of mice infected with *S.*  
494 *aureus* strain COL at 24 and 96 hpi. Control animals (sham) were treated with HBSS only. Cells  
495 were defined based on the staining profile listed below each graph and normalised to percentage  
496 of live cells. Istoype and  $\alpha$ IFN $\gamma$  treatments were compared, each dot represents an individual  
497 mouse, and the bar indicates the mean. Significant differences were determined using an  
498 unpaired Welch's T test (\*  $p < 0.05$ , \*\*  $p < 0.01$ ). (B) Schematic outlining clodronate liposome-  
499 based depletion of macrophages along with IFN $\gamma$  depletion used prior to i.v. infection of mice with  
500 *S. aureus* COL. (C) Bacterial burden in liver and kidney at 24 and 72 hpi are shown. Each dot  
501 represents an individual mouse, and the bar represents the geometric mean for CFUs/organ.  
502 Significant differences were determined using the Kruskal-Wallis test with uncorrected Dunn's  
503 test for multiple comparisons (\*  $p < 0.05$ , \*\*  $p < 0.01$ , \*\*\* $p < 0.001$  \*\*\*\* $p < 0.0001$ ).

504

505 **Figure 7: SEB and SEC elicit IFN $\gamma$  from human cells and excessive concentration can**  
506 **promote increased extracellular replication of *S. aureus* in monocyte derived**  
507 **macrophages.** (A) IFN $\gamma$  production by PBMC from human blood following stimulation with a  
508 titration of SEB protein. IFN $\gamma$  production by PBMC from human blood following stimulation with a  
509 titration of supernatant from *S. aureus* COL (B) or MW2 (C) constructs. Supernatants were taken  
510 from cultures grown for 8 h in BHI prior to use in these assays. Data shown (A-C) are mean  $\pm$   
511 SEM from 8 donors. Significant differences were determined from the area under each curve  
512 using a paired Friedman test for multiple comparison (\*  $p < 0.05$ , \*\*\*  $p < 0.001$ ). (D) Schematic  
513 outlining the procedure for intracellular *S. aureus* replication in monocyte derived human  
514 macrophages after dosing with recombinant human IFN $\gamma$ . *S. aureus* recovered from human  
515 macrophages after incubation at 48 h for strain COL (D) and 24h for strain MW2 (E) with varying  
516 concentrations of recombinant IFN $\gamma$ . Each dot represents macrophages form an individual human  
517 donor and the bar represents the geometric mean for CFUs/well. Significant differences between  
518 0 ng/ml of IFN $\gamma$  and other concentrations were determined using the Kruskal-Wallis test with  
519 uncorrected Dunn's test for multiple comparisons (\*  $p < 0.05$ , \*\*  $p < 0.01$ ).

520

521 MATERIALS AND METHODS

522 **Human Ethics Statement**

523 Human venous blood was taken from healthy donors in accordance with a human subject protocol  
524 approved by the London health sciences centre (LHSC) research ethics board, Western  
525 University, London, Ontario, Canada, under the protocol 110859. Volunteers were recruited by a  
526 passive advertising campaign within the Department of Microbiology and Immunology at Western  
527 University and following an outline of the risks, written informed consent was given by each  
528 volunteer before each sample was taken. Following sampling, blood was fully anonymized and  
529 no information regarding the identity of the donor, including sex and age, was retained.

### 530 **Mice**

531 Eight-to-eleven-week-old male and female HLA-DR4-IE (DRB1\*0401) humanized transgenic  
532 mice lacking endogenous mouse MHC-II on a C57BL/6 (B6) background (here referred to as  
533 DR4-B6 mice) (38) or B6 mice were used for all *in vivo* infection experiments. DR4-B6 animals  
534 were bred onsite at Western University and B6 mice were purchased directly from the Jackson  
535 Laboratory (Stock N° 000664). Animals for experiments were housed in single sex cages which  
536 did not exceed 4 in number. During all breeding and experiments, mice were provided food and  
537 water *ad libitum* and appropriate enrichment was provided in all cages. All animal experiments  
538 were in accordance with the Canadian Council on Animal Care Guide to the Care and Use of  
539 Experimental Animals, and the animal protocol was approved by the Animal Use Subcommittee  
540 at Western University.

### 541 **Bacterial strains, media, and growth conditions**

542 *S. aureus* strains listed in Table S1 were grown aerobically at 37°C in tryptic soy broth (TSB)  
543 (Difco) or brain heart infusion broth with shaking (250 rpm) supplemented with the appropriate  
544 antibiotics. For solid phase cultures tryptic soy agar (TSA) was used (TSB+ 1.5% w/v agar, Fisher  
545 Scientific) supplemented with the appropriate antibiotics. *Escherichia coli* strains were used as  
546 cloning hosts and were grown in Luria-Bertani (LB) broth (Difco) or LB agar supplemented with  
547 appropriate antibiotics at 37°C with shaking (250 rpm). Growth curve analysis was performed  
548 using a Biotek Synergy H4 multimode plate reader.

### 549 **Construction of MW2 $\Delta$ sec mutant**

550 Markerless deletion of *sec* in MW2 was performed using the pKor1 allelic replacement system  
551 (Bae and Schneewind, 2006). Briefly, a 598 bp fragment upstream of *sec* was amplified with  
552 Phusion™ High-Fidelity DNA Polymerase (Thermo Fisher) using the primers (Table S2) pKOR-  
553 *sec*-upstream-For and pKOR-*sec*-upstream-Rev along with a 576 bp region downstream of *sec*

554 amplified by the primers pKOR-sec-downstream-For and pKOR-sec-downstream-Rev 2. These  
555 products contained a 12 bp overlap and were spliced together at a ratio of 1:1 using primers  
556 pKOR-sec-upstream-For and pKOR-sec-downstream-Rev, creating an insert of 1203 bp in total.  
557 This insert was integrated into empty pKOR1 using BP clonase (Thermo Fisher) according to the  
558 manufacture's instructions. The cloned plasmids were transformed into *E. coli* XL1-Blue and  
559 screened for plasmids containing the insert. The confirmed knockout construct was chemically  
560 transformed into *E. coli* SA30B (Monk et al., 2015) to methylate the plasmid for  
561 electrotransformation into *S. aureus* MW2 (Monk et al., 2012). The *sec* knockout was created as  
562 described previously (Bae and Schneewind, 2006) and candidate constructs were screened by  
563 PCR using primers SEC-screen-For and SEC-screen-Rev (Table S2).

#### 564 **Construction of pCM29::*seb* and pCM29::*sec* complementation plasmids**

565 SEB and SEC-complementation plasmids for *S. aureus* SAg null mutants were created as  
566 previously described, with modifications (Vrieling et al., 2020). Briefly, SAg coding sequences  
567 were cloned into a pCM29 vector containing the active promotor of the leukocidin LukMF' (Vrieling  
568 et al., 2015). To achieve this, pCM29::pLukM-sGFP was digested with KpnI and EcoRI to remove  
569 the sGFP coding sequence while retaining the *lukM* promotor sequence. SAg insert fragment  
570 forward primers were designed to contain endogenous RBS upstream of the start codon as this  
571 would be removed from the plasmid with the *sgfp* gene. Sequences of *seb* and *sec* were amplified  
572 respectively from COL and MW2 genomic DNA using Phusion™ High-Fidelity DNA Polymerase  
573 (Thermo Fisher) with primers listed in Table S2. PCR products were digested with KpnI and EcoRI  
574 to prepare the SAg insert for ligation. Complementation inserts were ligated into pCM29 that had  
575 the *sgfp* removed with T4 ligase (NEB). Following ligation, plasmids were further digested with  
576 MluI to inactivate any contaminating pCM29 that still retained the *sgfp*. After this step, ligations  
577 were transformed into *E. coli* SA30B (Monk et al., 2015) for appropriate methylation before  
578 transformation, of sequence positive constructs, into electrocompetent *S. aureus* using a protocol  
579 previously described (Monk et al., 2012).

#### 580 **Protein expression analysis**

581 Recombinant staphylococcal enterotoxin B (SEB) was generated as described previously (Chau  
582 et al., 2009). Briefly, SEB was expressed with a His-tag in BL21 (DE3) *E. coli* and purified by  
583 nickel column chromatography. An attenuated mutant of SEB that has impaired binding to TCR  
584 was also purified. The mutant SEB carries an N→A point mutation at position 23 and is referred  
585 to as SEB<sub>N23A</sub> (Hayworth et al., 2012; Leder et al., 1998).

## 586 **Murine splenocyte analysis**

587 The ability of murine cells to respond to SEB was determined using interleukin-2 (IL-2) production.  
588 Mouse spleens were removed and broken into a single-cell suspension, followed by red blood  
589 cell lysis in ammonium-chloride-potassium (ACK) buffer. The remaining cells were suspended in  
590 complete RPMI (cRPMI), containing RPMI (Invitrogen Life Technologies) supplemented with 10%  
591 Fetal Bovine Serum (FBS) (Wisent Inc., Quebec, Canada), 100 µg/ml streptomycin, 100 U/ml  
592 penicillin (Gibco), 2 mM L-glutamine (Gibco), 1 mM sodium pyruvate (Gibco), 100 µM nonessential  
593 amino acids (Gibco), 25 mM HEPES (pH 7.2) (Gibco), and 2 µg/ml polymyxin B (Gibco). Cell  
594 suspension was seeded into 96-well plates at a density of  $1.1 \times 10^6$  cells/ml. Titrating  
595 concentrations of recombinant SEB were added to cells and incubated for 18 h at 37°C with 5%  
596 CO<sub>2</sub>. Supernatants were assayed for IL-2 by enzyme-linked immunosorbent assay (ELISA)  
597 according to the manufacturer's instructions (Thermo fisher). For flow cytometry, cells were dual  
598 stained with phycoerythrin (PE)-conjugated anti-CD25 (clone PC61.5) (eBioscience) and FITC-  
599 conjugated anti-Vβ8 (clone KJ16) (eBioscience). Events were acquired using a FACSCanto II  
600 (BD Biosciences), and data were analyzed using FlowJo v.10.7.1 TreeStar).

## 601 **Staphylococcal bacteraemia model**

602 Single bacterial colonies were picked from a TSA plate and grown in 3 ml TSB overnight (16 to  
603 18 h). Cells were subsequently subcultured in TSB to an OD<sub>600</sub> of 0.1 and grown to post-  
604 exponential phase (OD<sub>600</sub> ~3.0 to 3.5). The bacterial pellet was washed once and resuspended  
605 in HBSS to an OD<sub>600</sub> of 0.15 for strain COL and 0.85 for strain MW2, corresponding to  $\sim 5 \times 10^7$   
606 CFU/ml. Mice were injected via the tail vein with  $5 \times 10^6$  CFU of *S. aureus* in a total volume of  
607 100 µl. Mice were weighed and monitored daily. At various timepoints post-infection, mice were  
608 sacrificed (maximum of 3 and 4 days for MW2 and COL, respectively), and the kidneys and liver  
609 were aseptically harvested. All organs were homogenized, plated on mannitol salt agar (Difco),  
610 and incubated at 37°C overnight. *S. aureus* colonies were enumerated the following day with a  
611 limit of detection determined to be 3 CFU per 10 µl.

## 612 **Antibody depletion protocols**

613 CD4<sup>+</sup> and CD8<sup>+</sup> T cells were depleted in animals according to a protocol described previously  
614 (Zeppa et al., 2017). Briefly, mice were injected with 300 µg of T-cell depleting antibodies [anti-  
615 CD4 (clone GK1.5, BioXCell); anti-CD8 (clone YTS169.4, BioXCell); or both, at 150 µg each] or  
616 isotype control (clone LTF-2, BioXCell) 7, 6 and 1 day before infection with *S. aureus*. For IL-17A  
617 depletion, mice were treated with 200 µg dose of an anti-IL-17A mAb (clone 17F3; BioXCell,) or

618 a mouse IgG1 isotype control (clone MOPC-21, BioXCell) 3 h before *S. aureus* infection, then  
619 with a further 100 µg dose 1 h after infection, as described previously (Szabo et al., 2017c). For  
620 IL-10 and IFN $\gamma$  depletions, mice were treated with a 250 µg dose of anti-IL-10 mAb (clone JES5-  
621 2A5), anti-IFN $\gamma$  (clone XMG1.2, BioXCell) or Rat IgG1 isotype control, anti-horseradish  
622 peroxidase (clone HRPN) 18 h prior to infection. NK cells were depleted in mice with 200 µg of  
623 anti-NK1.1 mAb (clone PK136, BioXCell) or mouse IgG2a isotype control (clone Cl.18, BioXCell)  
624 administered 18 h prior to infection, as described previously (Hayworth et al., 2012). All antibody  
625 doses were prepared in 100µl – 200 µl PBS and administered by intraperitoneal (i.p.) injection.

#### 626 **Detection of cytokines and chemokines *in vivo***

627 At various time point post-infection, serum supernatants and livers were collected. Supernatants  
628 were obtained from whole livers by homogenization in HBSS supplemented with the complete  
629 protease inhibitor cocktail (Roche). Samples were analyzed using Mouse Cytokine  
630 Array/Chemokine Array 44-Plex (MD44, Eve Technologies). AST levels were assessed from  
631 murine serum using a mouse aspartate aminotransferase (AST) ELISA Kit (Abcam).

#### 632 **Flow cytometry analysis of murine cells**

633 Livers were extracted from mice and pushed through a 0.7 µm cell strainer. Leukocytes were  
634 isolated from livers using a 33.75% Percoll gradient (GE Healthcare). Following isolation, red  
635 blood cells were lysed using ammonium-chloride-potassium (ACK) lysis buffer (Gibco) and  
636 washed with PBS containing 2% FBS. Cell viability was first determined using Fixable Viability  
637 Dye eFluor™ 506 (Thermo Fisher) and then subsequently stained anti-CD4-PE-Cy5 (clone RM4-  
638 5, Thermo Fisher) anti-CD45r-V450 (clone RA3-6B2, BD), anti-F4/80-A647 (clone BM8,  
639 Biolegend), anti-Ly6G-A700 (clone RB6-8C5, Biolegend), anti-Ly6C-BV711 (clone RB6-8C5,  
640 Biolegend), and anti-CD11b-PE (clone M1/70, Biolegend). Cells were fixed overnight with 1%  
641 paraformaldehyde prior to analysis. Events were acquired and data analyzed as outlined above.  
642 Events were acquired using a LSR II (BD Biosciences), and data were analyzed using FlowJo  
643 v10.7.1 (TreeStar).

#### 644 **Macrophage depletion in mice**

645 Macrophage depletion was based on a protocol previously described (Stritzker et al., 2010).  
646 Briefly, 200 µl of Clodronate containing liposomes and control liposomes [Clodrosome® +  
647 Encapsome® (Encapsula Nano Sciences)] were administered to the mice i.p. 2 days and 4 h prior



648 to infection with bacteria. At 18 h prior to infection, IFN $\gamma$  depleting or control antibodies were also  
649 administered to the mice.

#### 650 **Detection of human cytokines from stimulated human cells**

651 The ability of human cells to produce cytokines was determined from stimulated peripheral blood  
652 mononuclear cells (PBMC). These cells were isolated from human blood by density-based  
653 centrifugation following layering of the blood onto Ficoll-Hypaque plus (GE healthcare). Cells were  
654 isolated and washed three times in RPMI (Gibco) and then resuspended in cRPMI. Cell  
655 suspension was seeded into 96-well plates to a final concentration of  $1.0 \times 10^6$  cells/ml. Titrating  
656 concentrations of recombinant proteins or *S. aureus* supernatants were added to cells and  
657 incubated for 18 h at 37°C with 5% CO $_2$ . Supernatants were assayed for IL-2 or IFN $\gamma$  by enzyme-  
658 linked immunosorbent assay (ELISA) according to the manufacturer's instructions (Thermo  
659 fisher).

#### 660 **Human macrophage cultures and infections**

661 Primary human macrophages were derived from blood monocytes isolated from healthy human  
662 volunteers as previously described (Flannagan et al., 2012, 2016). Briefly, mononuclear cells  
663 were isolated from blood with lympholyte®-poly (Cedarlane Laboratories) according to the  
664 manufacturer's instructions. Monocytes adhered to glass coverslips in 12-well plates ( $1.5 \times 10^6$   
665 cells/well) and were subsequently cultured for 7–9 days in RPMI (Gibco) with 10% FBS (Wisent)  
666 and 0.5 ng/ml recombinant human Macrophage Colony Stimulating factor (M-CSF) (R&D  
667 Systems) to allow for differentiation of monocytes into macrophages. After 5 days of  
668 differentiation, adhered cells were washed with PBS, and the medium was replaced with fresh  
669 RPMI + 10% FBS containing M-CSF. Macrophages were differentiated to day 7 and used  
670 experimentally until day 10.

671 *S. aureus* strains COL and MW2 were cultured overnight in TSB then pelleted and re-  
672 suspended in serum free RPMI and then diluted in serum free RPMI to an OD $_{600}$  of 0.5. Cells  
673 were infected with an MOI of 30 and following inoculation were centrifuged at  $277 \times g$  for 2 min,  
674 then incubated for 30 min at 37°C in the presence of 5% CO $_2$ . Following phagocytosis, cells were  
675 treated with RPMI containing gentamicin (100  $\mu$ g/mL) for 1 h at 37°C to kill extracellular bacteria.  
676 After gentamicin treatment, macrophages were rinsed with PBS and incubated further in RPMI  
677 containing 10% FBS without antibiotic. At this point, recombinant human IFN $\gamma$  (R&D Systems)  
678 was also added at varying concentrations. Macrophages were incubated for 24 or 48 h following  
679 infection with MW2 or COL, respectively. Enumeration of antibiotic-protected bacteria (i.e.



680 intracellular bacteria) was performed by lysing infected macrophages with 0.1% (v/v) Triton X-100  
681 in PBS. Macrophage lysates were serially diluted and plated on TSA for enumeration.

## 682 **Statistical analysis**

683 All statistical analysis were performed using GraphPad prism 9. In all tests a P value <  
684 0.05 was considered statistically significant. For all bacterial burden CFU, analysis was performed  
685 with non-parametric Mann Whitney or Kruskal-Wallis test with uncorrected Dunn's test for multiple  
686 comparisons, depending on group numbers. Flow Cytometry data was analysed using Welch's T  
687 test to determine significant differences between means of the isotype and IFN $\gamma$  depleted groups.

688 For the multiplex cytokine analysis heat map shown in Fig 5D, each raw data point was  
689 normalized to a sample taken from an uninfected control animal that was sacrificed at the same  
690 timepoint after treatment with the same antibody. Following normalization, the data from analysis  
691 at each timepoint was compared for statistical significance between the Isotype and IFN $\gamma$   
692 depletion using a students T test. All significant values were extracted, and the mean quantity of  
693 the cytokine/chemokine detected in the isotype treated animals was divided by the quantity  
694 detected in the IFN $\gamma$  depleted group. These values were converted to log<sub>10</sub> values to give fold-  
695 change in positive and negative values that could be plotted on a heatmap.

696 For human cytokine analysis performed in Fig 7A-C, the area under each curve for each  
697 donor was determined. These values where then compared using a paired T test or paired  
698 Friedman test for multiple comparisons, depending on the number of groups. Paired tests were  
699 used due to the large variation observed between individual human donors.

700 REFERENCES

- 701 Alonzo, F., and Torres, V.J. (2014). The bicomponent pore-forming leucocidins of  
702 *Staphylococcus aureus*. *Microbiol. Mol. Biol. Rev.* *78*, 199–230.
- 703 Aoyama, T., Inokuchi, S., Brenner, D.A., and Seki, E. (2010). CX3CL1-CX3CR1 interaction  
704 prevents carbon tetrachloride-induced liver inflammation and fibrosis in mice. *Hepatology* *52*,  
705 1390–1400.
- 706 Bae, T., and Schneewind, O. (2006). Allelic replacement in *Staphylococcus aureus* with  
707 inducible counter-selection. *Plasmid* *55*, 58–63.
- 708 Berube, B., and Wardenburg, J. (2013). *Staphylococcus aureus*  $\alpha$ -Toxin: Nearly a Century of  
709 Intrigue. *Toxins (Basel)*. *5*, 1140–1166.
- 710 Brown, A.F., Murphy, A.G., Lalor, S.J., Leech, J.M., O’Keeffe, K.M., Mac Aogáin, M.,  
711 O’Halloran, D.P., Lacey, K.A., Tavakol, M., Hearnden, C.H., et al. (2015). Memory Th1 Cells Are  
712 Protective in Invasive *Staphylococcus aureus* Infection. *PLoS Pathog.* *11*, 1–32.
- 713 Chau, T. a, McCully, M.L., Brintnell, W., An, G., Kasper, K.J., Vines, E.D., Kubes, P., Haeryfar,  
714 S.M.M., McCormick, J.K., Cairns, E., et al. (2009). Toll-like receptor 2 ligands on the  
715 staphylococcal cell wall downregulate superantigen-induced T cell activation and prevent toxic  
716 shock syndrome. *Nat Med* *15*, 641–648.
- 717 Corl, K.A., Zeba, F., Caffrey, A.R., Hermenau, M., Lopes, V., Phillips, G., Merchant, R.C., Levy,  
718 M.M., and LaPlante, K.L. (2020). Delay in Antibiotic Administration Is Associated With Mortality  
719 Among Septic Shock Patients With *Staphylococcus aureus* Bacteremia. *Crit. Care Med.* *48*,  
720 525–532.
- 721 Flannagan, R.S., Jaumouillé, V., Huynh, K.K., Plumb, J.D., Downey, G.P., Valvano, M.A., and  
722 Grinstein, S. (2012). *Burkholderia cenocepacia* disrupts host cell actin cytoskeleton by  
723 inactivating Rac and Cdc42. *Cell. Microbiol.* *14*, 239–254.
- 724 Flannagan, R.S., Heit, B., and Heinrichs, D.E. (2016). Intracellular replication of *Staphylococcus*  
725 *aureus* in mature phagolysosomes in macrophages precedes host cell death, and bacterial  
726 escape and dissemination. *Cell. Microbiol.* *18*, 514–535.
- 727 Foster, T.J., Geoghegan, J.A., Ganesh, V.K., and Höök, M. (2014). Adhesion, invasion and  
728 evasion: the many functions of the surface proteins of *Staphylococcus aureus*. *Nat. Rev.*  
729 *Microbiol.* *12*, 49–62.

- 730 Fowler, V.G., Allen, K.B., Moreira, E.D., Moustafa, M., Isgro, F., Boucher, H.W., Corey, G.R.,  
731 Carmeli, Y., Betts, R., Hartzel, J.S., et al. (2013). Effect of an investigational vaccine for  
732 preventing *Staphylococcus aureus* infections after cardiothoracic surgery: a randomized trial.  
733 *JAMA* 309, 1368–1378.
- 734 Hayworth, J.L., Mazzuca, D.M., Maleki Vareki, S., Welch, I., McCormick, J.K., and Haeryfar,  
735 S.M.M. (2012). CD1d-independent activation of mouse and human iNKT cells by bacterial  
736 superantigens. *Immunol. Cell Biol.* 90, 699–709.
- 737 Horras, C.J., Lamb, C.L., and Mitchell, K.A. (2011). Regulation of hepatocyte fate by interferon-  
738  $\gamma$ . *Cytokine Growth Factor Rev.* 22, 35–43.
- 739 Hotchkiss, R.S., Monneret, G., and Payen, D. (2013). Immunosuppression in sepsis: a novel  
740 understanding of the disorder and a new therapeutic approach. *Lancet Infect. Dis.* 13, 260.
- 741 Jorch, S.K., Surewaard, B.G.J., Hossain, M., Peiseler, M., Deppermann, C., Deng, J.,  
742 Bogoslawski, A., Wal, F. van der, Omri, A., Hickey, M.J., et al. (2019). Peritoneal GATA6+  
743 macrophages function as a portal for *Staphylococcus aureus* dissemination. *J. Clin. Invest.* 129,  
744 4643.
- 745 Josse, J., Laurent, F., Diot, A., and Konkell, M.E. (2017). Staphylococcal Adhesion and Host Cell  
746 Invasion : Fibronectin-Binding and Other Mechanisms. 8, 1–8.
- 747 Karauzum, H., Haudenschild, C.C., Moore, I.N., Mahmoudieh, M., Barber, D.L., and Datta, S.K.  
748 (2017). Lethal CD4 T cell responses induced by vaccination against *Staphylococcus aureus*  
749 bacteremia. *J. Infect. Dis.* 215, 1231–1239.
- 750 Kasper, K.J., Zeppa, J.J., Wakabayashi, A.T., Xu, S.X., Mazzuca, D.M., Welch, I., Baroja, M.L.,  
751 Kotb, M., Cairns, E., Cleary, P.P., et al. (2014). Bacterial superantigens promote acute  
752 nasopharyngeal infection by *Streptococcus pyogenes* in a human MHC Class II-dependent  
753 manner. *PLoS Pathog* 10, e1004155.
- 754 King, J.M., Kulhankova, K., Stach, C.S., Vu, B.G., and Salgado-Pabón, W. (2016). Phenotypes  
755 and virulence among *Staphylococcus aureus* USA100, USA200, USA300, USA400, and  
756 USA600 clonal lineages. *MSphere* 1, e00071-16.
- 757 Koymans, K.J., Vrieling, M., Gorham, R.D., and van Strijp, J.A.G. (2017). Staphylococcal  
758 Immune Evasion Proteins: Structure, Function, and Host Adaptation. In *Staphylococcus Aureus:*  
759 *Microbiology, Pathology, Immunology, Therapy and Prophylaxis*, F. Bagnoli, R. Rappuoli, and

- 760 G. Grandi, eds. (Cham: Springer International Publishing), pp. 441–489.
- 761 Kwiecinski, J.M., and Horswill, A.R. (2020). Staphylococcus aureus bloodstream infections:  
762 pathogenesis and regulatory mechanisms. *Curr. Opin. Microbiol.* *53*, 51–60.
- 763 Leder, L., Llera, A., Lavoie, P.M., Lebedeva, M.I., Li, H., Sekaly, R.P., Bohach, G.A., Gahr, P.J.,  
764 Schlievert, P.M., Karjalainen, K., et al. (1998). A mutational analysis of the binding of  
765 staphylococcal enterotoxins B and C3 to the T cell receptor beta chain and major  
766 histocompatibility complex class II. *J Exp Med* *187*, 823–833.
- 767 McLoughlin, R.M., Lee, J.C., Kasper, D.L., and Tzianabos, A.O. (2008). IFN- $\gamma$  Regulated  
768 Chemokine Production Determines the Outcome of Staphylococcus aureus Infection. *J.*  
769 *Immunol.* *181*, 1323–1332.
- 770 Monk, I.R., Shah, I.M., Xu, M., Tan, M.W., and Foster, T.J. (2012). Transforming the  
771 untransformable: Application of direct transformation to manipulate genetically Staphylococcus  
772 aureus and Staphylococcus epidermidis. *MBio* *3*.
- 773 Monk, I.R., Tree, J.J., Howden, B.P., Stinear, T.P., and Foster, T.J. (2015). Complete bypass of  
774 restriction systems for major Staphylococcus aureus lineages. *MBio* *6*, e00308-15.
- 775 Nalos, M., Santner-Nanan, B., Parnell, G., Tang, B., McLean, A.S., and Nanan, R. (2012).  
776 Immune Effects of Interferon Gamma in Persistent Staphylococcal Sepsis.  
777 <https://doi.org/10.1164/Ajrcm.185.1.110> *185*, 110–112.
- 778 Naundorf, S., Schröder, M., Höflich, C., Suman, N., Volk, H.-D., and Grütz, G. (2009). IL-10  
779 interferes directly with TCR-induced IFN-gamma but not IL-17 production in memory T cells.  
780 *Eur. J. Immunol.* *39*, 1066–1077.
- 781 Payen, D., Faivre, V., Miatello, J., Leentjens, J., Brumpt, C., Tissières, P., Dupuis, C., Pickkers,  
782 P., and Lukaszewicz, A.C. (2019). Multicentric experience with interferon gamma therapy in  
783 sepsis induced immunosuppression. A case series. *BMC Infect. Dis.* 2019 191 *19*, 1–10.
- 784 Pidwill, G.R., Gibson, J.F., Cole, J., Renshaw, S.A., and Foster, S.J. (2021). The Role of  
785 Macrophages in Staphylococcus aureus Infection. *Front. Immunol.* *11*, 620339.
- 786 Rellahan, B.L., Jones, L.A., Kruisbeek, A.M., Fry, A.M., and Matis, L.A. (1990). In vivo induction  
787 of anergy in peripheral V beta 8+ T cells by staphylococcal enterotoxin B. *J Exp Med* *172*,  
788 1091–1100.

- 789 Romero, C.R., Herzig, D.S., Etogo, A., Nunez, J., Mahmoudizad, R., Fang, G., Murphey, E.D.,  
790 Toliver-Kinsky, T., and Sherwood, E.R. (2010). The role of interferon- $\gamma$  in the pathogenesis of  
791 acute intra-abdominal sepsis. *J. Leukoc. Biol.* *88*, 725.
- 792 Rudd, K.E., Johnson, S.C., Agesa, K.M., Shackelford, K.A., Tsoi, D., Kievlan, D.R., Colombara,  
793 D. V, Ikuta, K.S., Kisson, N., Finfer, S., et al. (2020). Global, regional, and national sepsis  
794 incidence and mortality, 1990-2017: analysis for the Global Burden of Disease Study. *Lancet*  
795 (London, England) *395*, 200–211.
- 796 Salgado-Pabón, W., and Schlievert, P.M. (2014). Models matter: the search for an effective  
797 *Staphylococcus aureus* vaccine. *Nat. Rev. Microbiol.* *12*, 585–591.
- 798 Salgado-Pabón, W., Breshears, L., Spaulding, A.R., Merriman, J.A., Stach, C.S., Horswill, A.R.,  
799 Peterson, M.L., and Schlievert, P.M. (2013). Superantigens are critical for *Staphylococcus*  
800 *aureus* infective endocarditis, sepsis, and acute kidney injury. *MBio* *4*.
- 801 Van Der Slikke, E.C., An, A.Y., Hancock, R.E.W., and Bouma, H.R. (2020). Exploring the  
802 pathophysiology of post-sepsis syndrome to identify therapeutic opportunities.
- 803 Spaan, A.N., Surewaard, B.G.J., Nijland, R., and van Strijp, J.A.G. (2013). Neutrophils versus  
804 *Staphylococcus aureus*: a biological tug of war. *Annu. Rev. Microbiol.* *67*, 629–650.
- 805 Spaulding, A.R., Salgado-Pabón, W., Kohler, P.L., Horswill, A.R., Leung, D.Y.M., and  
806 Schlievert, P.M. (2013). Staphylococcal and streptococcal superantigen exotoxins. *Clin.*  
807 *Microbiol. Rev.* *26*, 422–447.
- 808 Stritzker, J., Weibel, S., Seubert, C., Götz, A., Tresch, A., van Rooijen, N., Oelschlaeger, T.A.,  
809 Hill, P.J., Gentschev, I., and Szalay, A.A. (2010). Enterobacterial tumor colonization in mice  
810 depends on bacterial metabolism and macrophages but is independent of chemotaxis and  
811 motility. *Int. J. Med. Microbiol.* *300*, 449–456.
- 812 Surewaard, B.G.J., Deniset, J.F., Zemp, F.J., Amrein, M., Otto, M., Conly, J., Omri, A., Yates,  
813 R.M., and Kubes, P. (2016). Identification and treatment of the *Staphylococcus aureus* reservoir  
814 in vivo. *J. Exp. Med.* *213*, 1141–1151.
- 815 Surewaard, B.G.J., Thanabalasuriar, A., Zheng, Z., Tkaczyk, C., Cohen, T.S., Bardoel, B.W.,  
816 Jorch, S.K., Deppermann, C., Wardenburg, J.B., Davis, R.P., et al. (2018). Alpha Toxin induces  
817 Platelet Aggregation and Liver Injury During *Staphylococcus aureus* Sepsis. *Cell Host Microbe*  
818 *24*, 271.

- 819 Szabo, P.A., Rudak, P.T., Choi, J., Xu, S.X., Schaub, R., Singh, B., McCormick, J.K., and  
820 Haeryfar, S.M.M. (2017a). Invariant Natural Killer T Cells Are Pathogenic in the HLA-DR4-  
821 Transgenic Humanized Mouse Model of Toxic Shock Syndrome and Can Be Targeted to  
822 Reduce Morbidity. *J. Infect. Dis.* *215*, 824–829.
- 823 Szabo, P.A., Goswami, A., Mazzuca, D.M., Kim, K., O’Gorman, D.B., Hess, D.A., Welch, I.D.,  
824 Young, H.A., Singh, B., McCormick, J.K., et al. (2017b). Rapid and Rigorous IL-17A Production  
825 by a Distinct Subpopulation of Effector Memory T Lymphocytes Constitutes a Novel Mechanism  
826 of Toxic Shock Syndrome Immunopathology. *J. Immunol.* *198*, 2805–2818.
- 827 Szabo, P.A., Goswami, A., Mazzuca, D.M., Kim, K., O’Gorman, D.B., Hess, D.A., Welch, I.D.,  
828 Young, H.A., Singh, B., McCormick, J.K., et al. (2017c). Rapid and Rigorous IL-17A Production  
829 by a Distinct Subpopulation of Effector Memory T Lymphocytes Constitutes a Novel Mechanism  
830 of Toxic Shock Syndrome Immunopathology. *J. Immunol.* *198*, 2805–2818.
- 831 Tilahun, A.Y., Holz, M., Wu, T.-T., David, C.S., and Rajagopalan, G. (2011). Interferon Gamma-  
832 Dependent Intestinal Pathology Contributes to the Lethality in Bacterial Superantigen-Induced  
833 Toxic Shock Syndrome. *PLoS One* *6*, e16764.
- 834 Tong, S.Y.C., Davis, J.S., Eichenberger, E., Holland, T.L., and Fowler, V.G. (2015).  
835 *Staphylococcus aureus* infections: Epidemiology, pathophysiology, clinical manifestations, and  
836 management. *Clin. Microbiol. Rev.* *28*, 603–661.
- 837 Tuffs, S.W., James, D.B.A., Bestebroer, J., Richards, A.C., Goncheva, M.I., O’Shea, M., Wee,  
838 B.A., Seo, K.S., Schlievert, P.M., Lengeling, A., et al. (2017). The *Staphylococcus aureus*  
839 superantigen SEIX is a bifunctional toxin that inhibits neutrophil function. *PLoS Pathog.* *13*,  
840 e1006461.
- 841 Tuffs, S.W., Haeryfar, S.M.M., and McCormick, J.K. (2018). Manipulation of Innate and Adaptive  
842 Immunity by Staphylococcal Superantigens. *Pathog. (Basel, Switzerland)* *7*, 53.
- 843 Turner, N.A., Sharma-Kuinkel, B.K., Maskarinec, S.A., Eichenberger, E.M., Shah, P.P.,  
844 Carugati, M., Holland, T.L., and Fowler, V.G. (2019). Methicillin-resistant *Staphylococcus*  
845 *aureus*: an overview of basic and clinical research. *Nat. Rev. Microbiol.*
- 846 Vrieling, M., Koymans, K.J., Heesterbeek, D.A.C., Aerts, P.C., Rutten, V.P.M.G., Haas, C.J.C.  
847 de, Kessel, K.P.M. van, Koets, A.P., Nijland, R., and Strijp, J.A.G. van (2015). Bovine  
848 *Staphylococcus aureus* Secretes the Leukocidin LukMF’ To Kill Migrating Neutrophils through  
849 CCR1. *MBio* *6*.

850 Vrieling, M., Tuffs, S.W., Yebra, G., van Smoorenburg, M.Y., Alves, J., Pickering, A.C., Park,  
851 J.Y., Park, N., Heinrichs, D.E., Benedictus, L., et al. (2020). Population Analysis of  
852 *Staphylococcus aureus* Reveals a Cryptic, Highly Prevalent Superantigen SEIW That  
853 Contributes to the Pathogenesis of Bacteremia. *MBio* 11.

854 Wilson, G.J., Seo, K.S., Cartwright, R.A., Connelley, T., Chuang-Smith, O.N., Merriman, J.A.,  
855 Guinane, C.M., Park, J.Y., Bohach, G.A., Schlievert, P.M., et al. (2011). A Novel Core Genome-  
856 Encoded Superantigen Contributes to Lethality of Community-Associated MRSA Necrotizing  
857 Pneumonia. *PLoS Pathog.* 7, e1002271.

858 Xu, S., and Cao, X. (2010). Interleukin-17 and its expanding biological functions. *Cell. Mol.*  
859 *Immunol.* 7, 164–174.

860 Xu, S., Kasper, K., Zeppa, J., and McCormick, J. (2015). Superantigens Modulate Bacterial  
861 Density during *Staphylococcus aureus* Nasal Colonization. *Toxins (Basel).* 7, 1821–1836.

862 Xu, S.X., Gilmore, K.J., Szabo, P.A., Zeppa, J.J., Baroja, M.L., Haeryfar, S.M.M., and  
863 McCormick, J.K. (2014). Superantigens subvert the neutrophil response to promote abscess  
864 formation and enhance *Staphylococcus aureus* survival in vivo. *Infect. Immun.* 82, 3588–3598.

865 Zeppa, J.J., Kasper, K.J., Mohorovic, I., Mazzuca, D.M., Haeryfar, S.M.M., and McCormick, J.K.  
866 (2017). Nasopharyngeal infection by *Streptococcus pyogenes* requires superantigen-responsive  
867 V $\beta$ -specific T cells. *Proc. Natl. Acad. Sci.* 114, 10226–10231.

868 Zhao, Y.X., Nilsson, I.M., and Tarkowski, A. (1998). The dual role of interferon- $\gamma$  in experimental  
869 *Staphylococcus aureus* septicaemia versus arthritis. *Immunology* 93, 80–85.

870



FIGURES

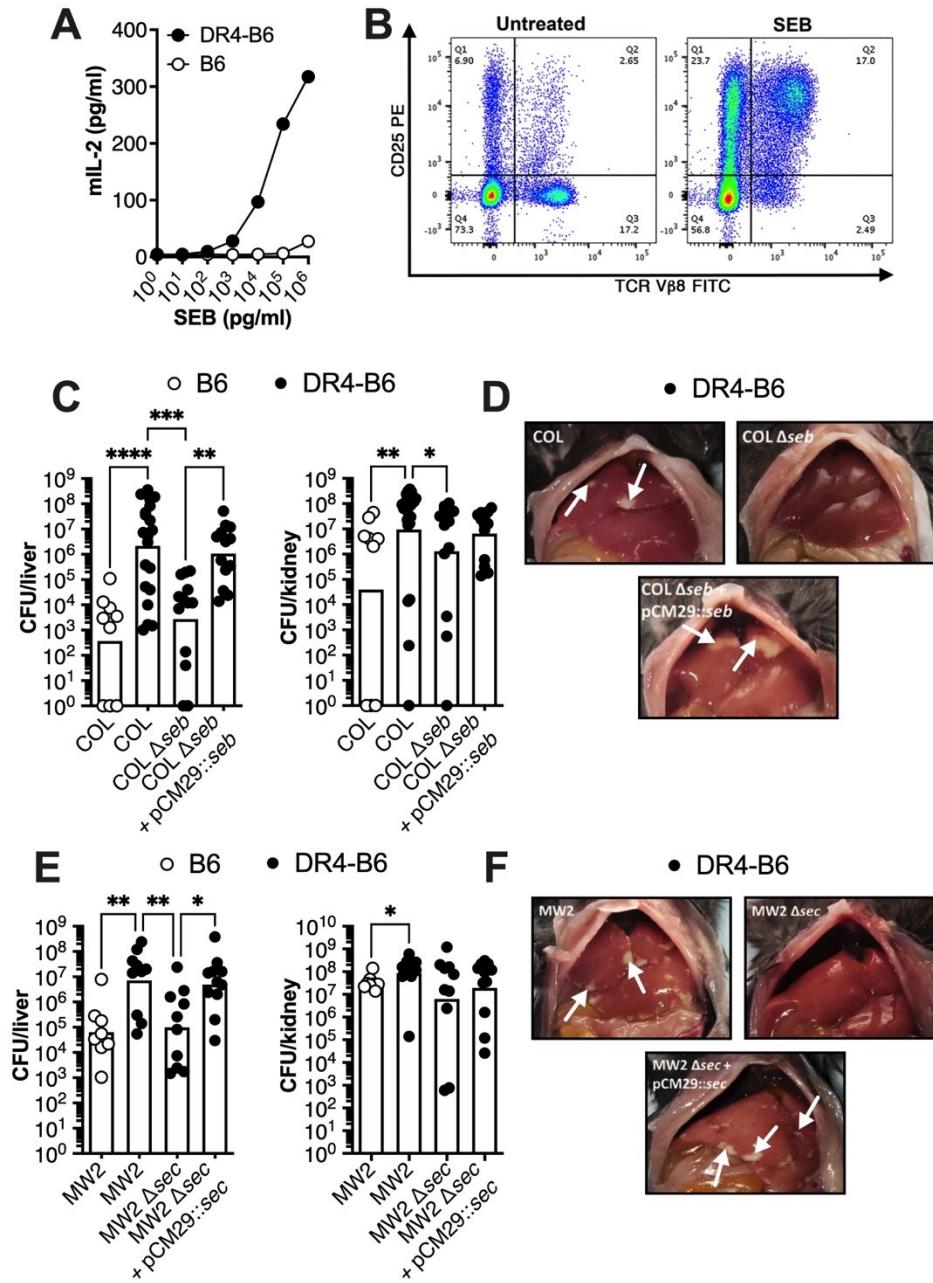

FIGURE 1

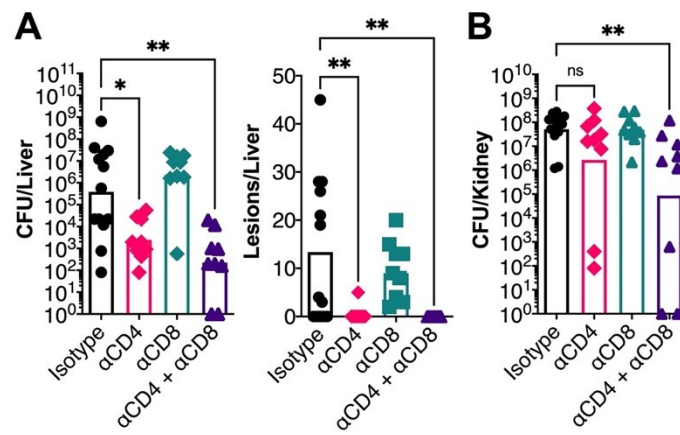

FIGURE 2

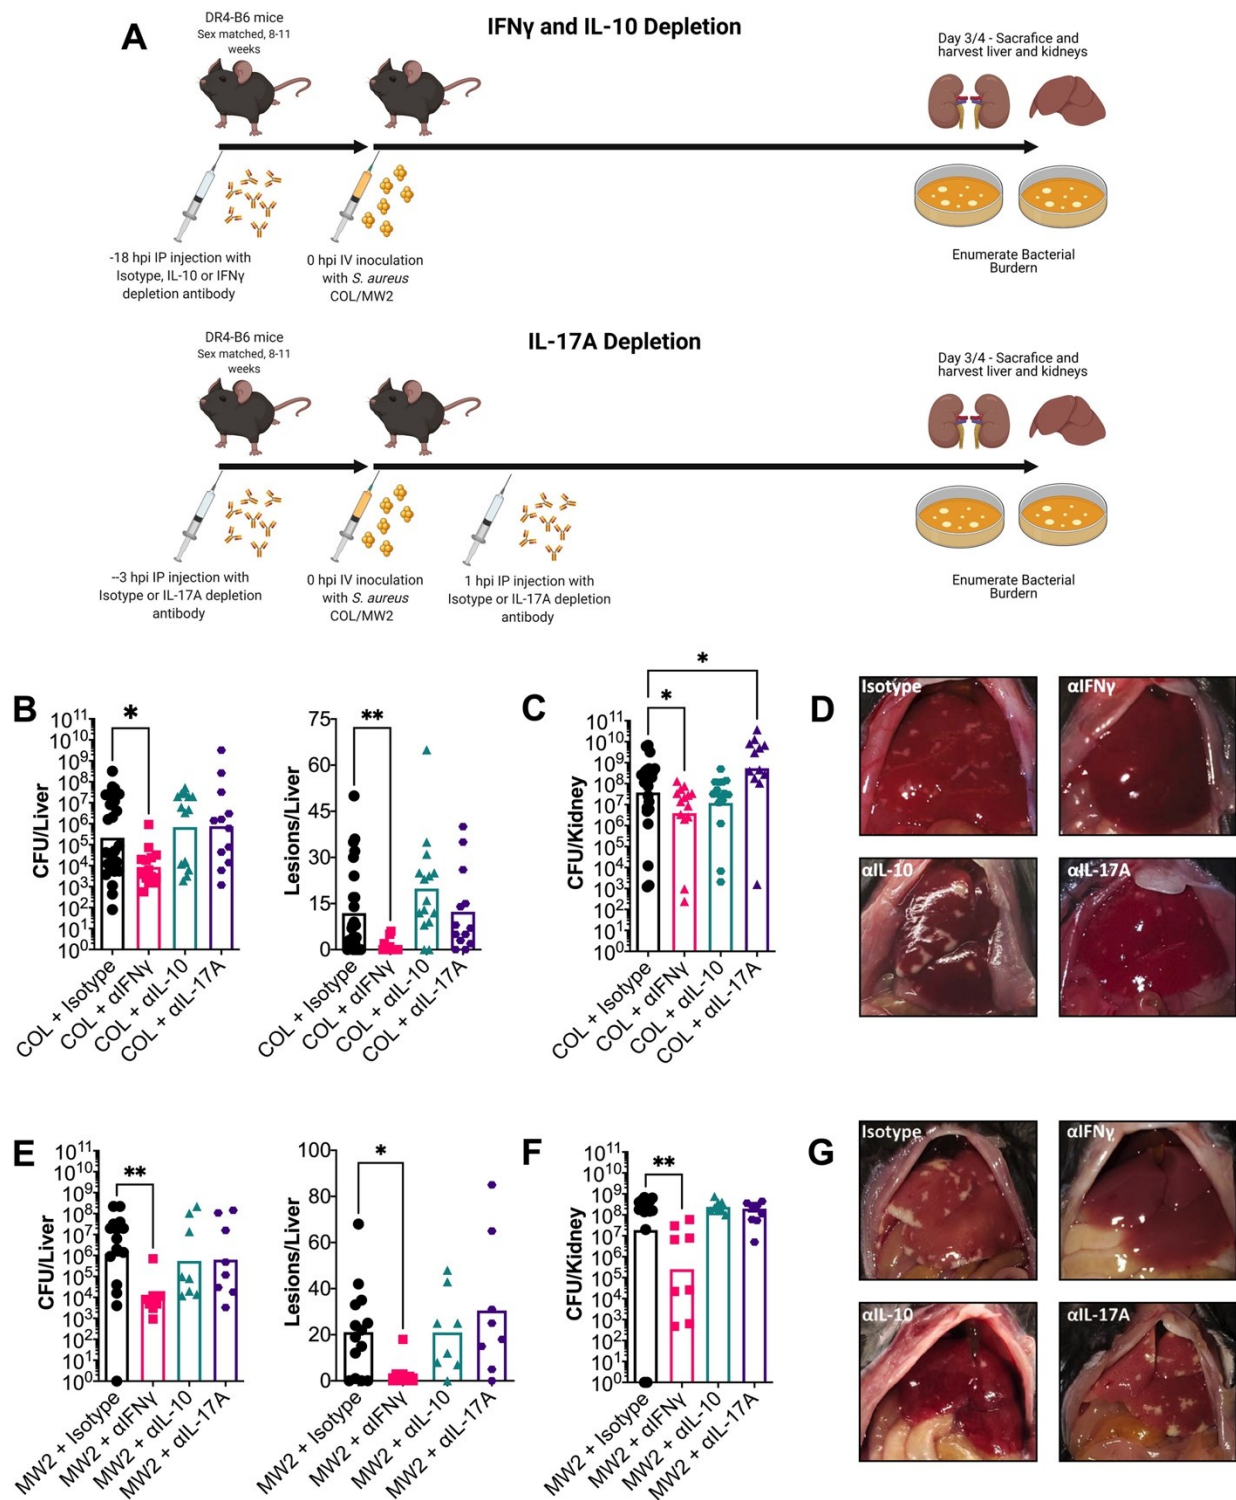

FIGURE 3

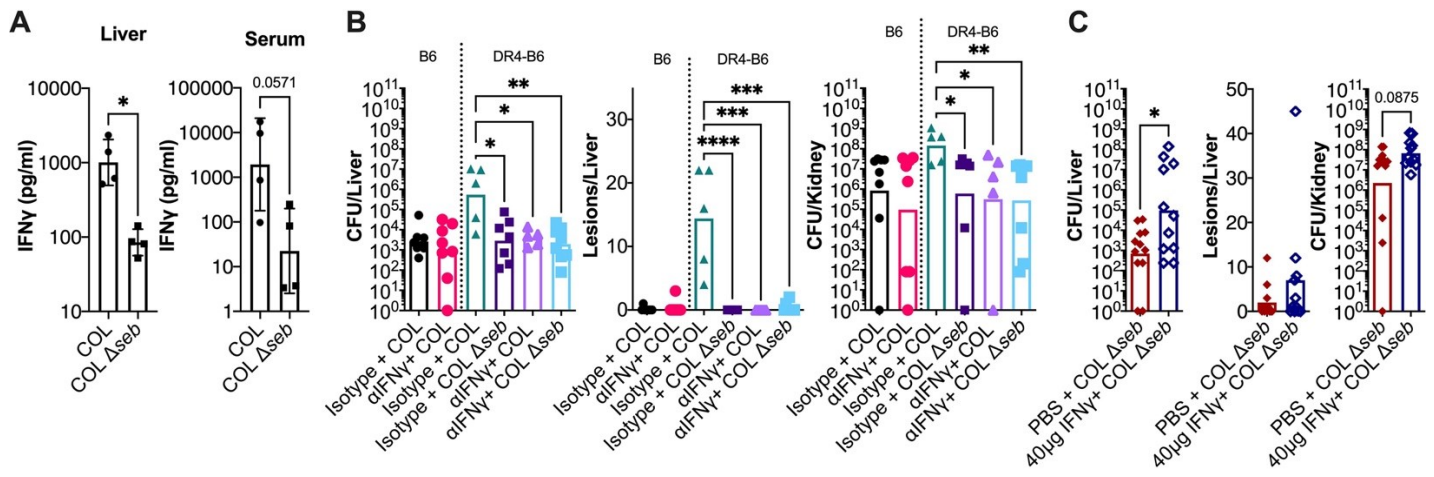

FIGURE 4

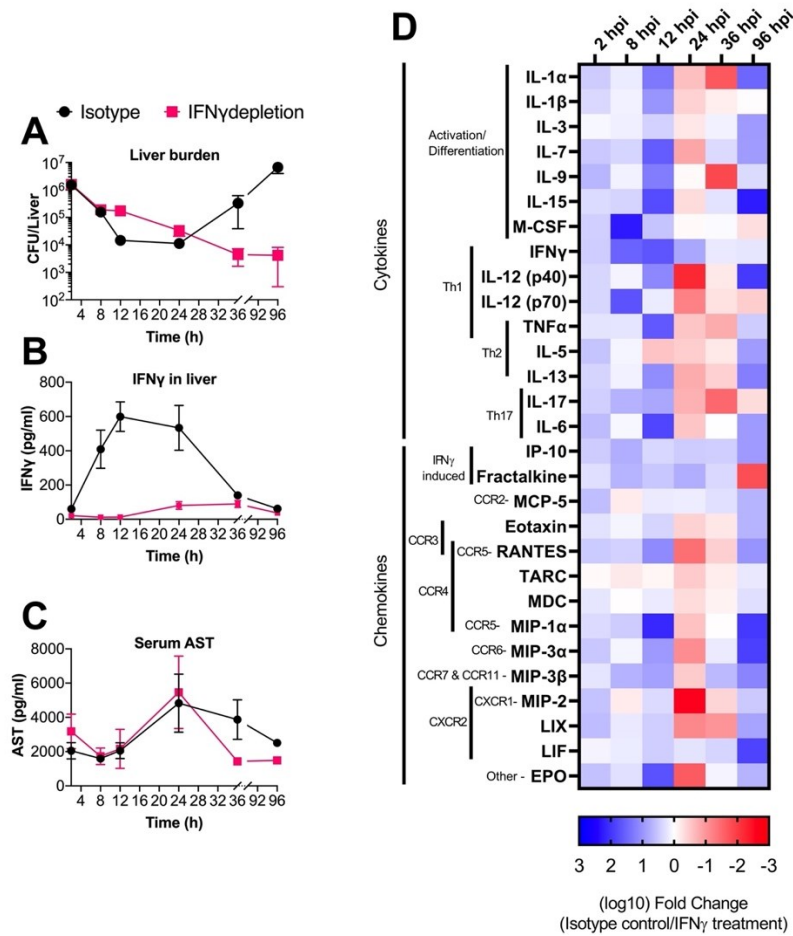

FIGURE 5

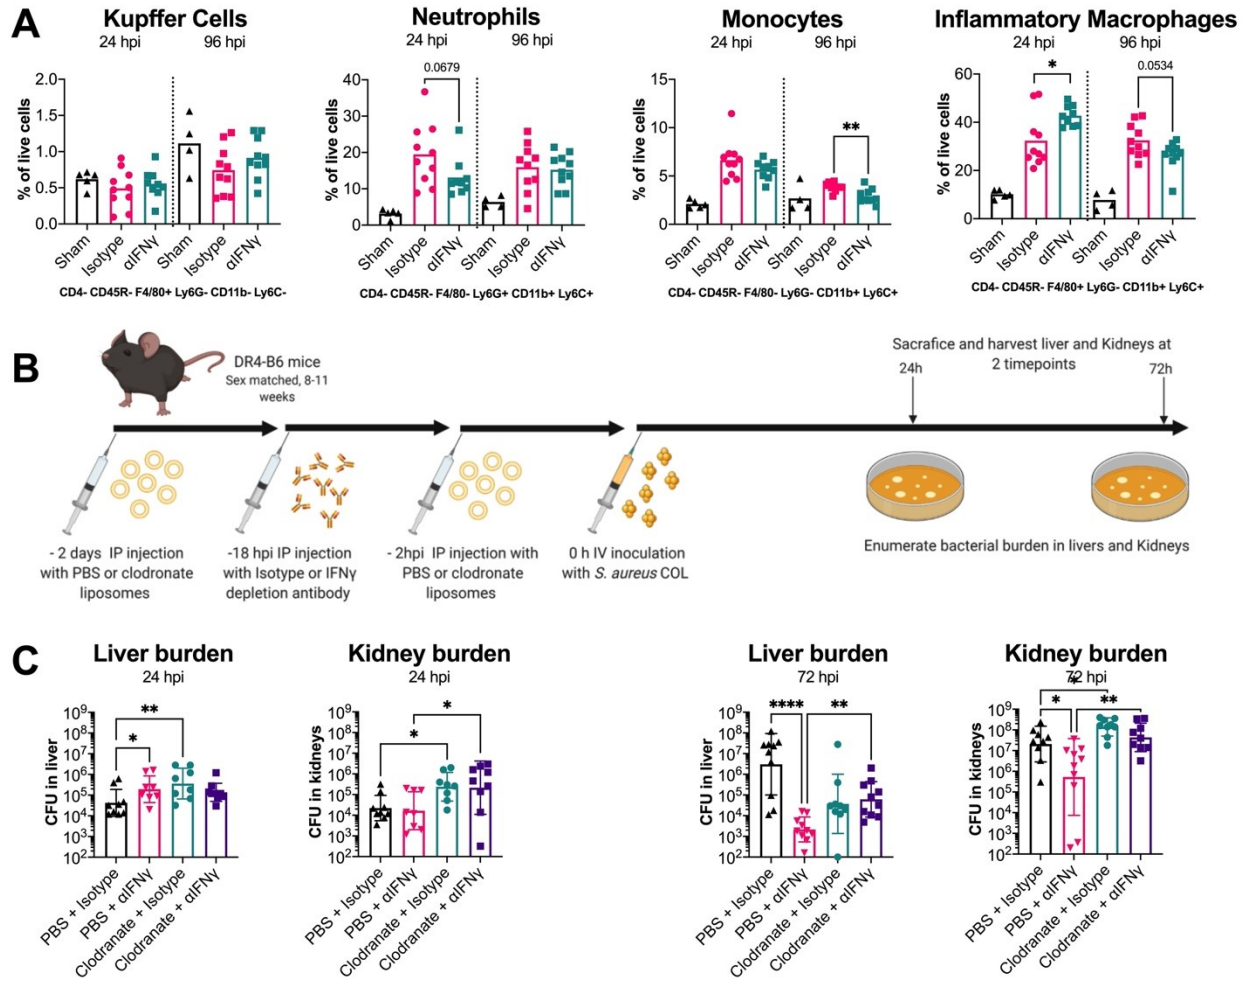

FIGURE 6



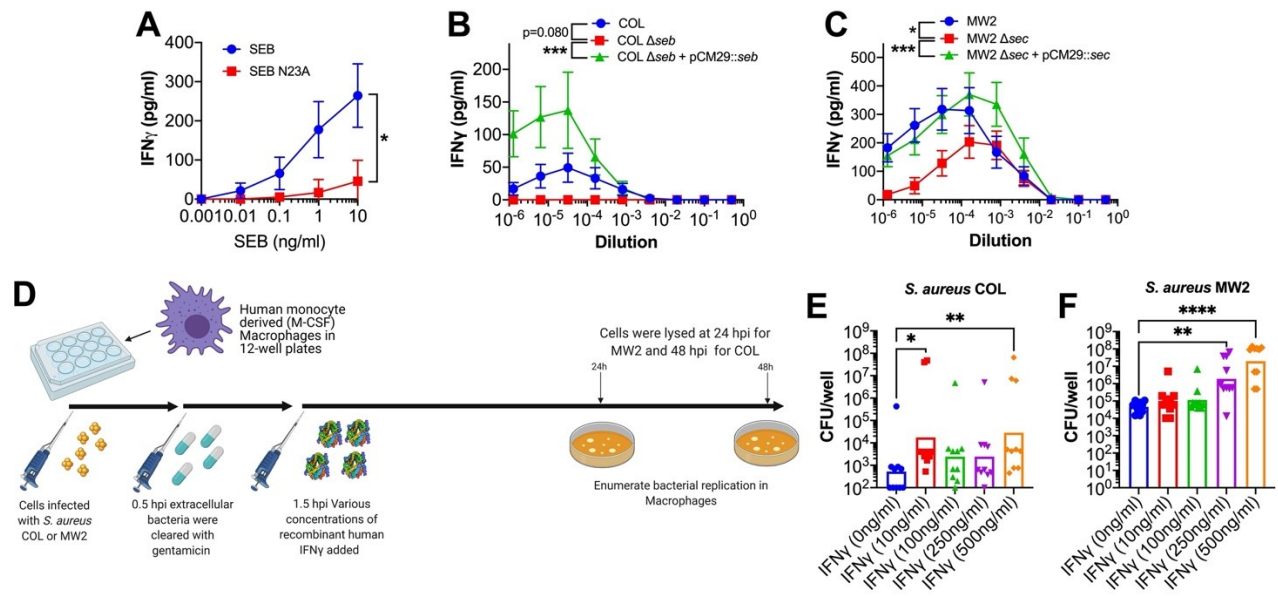

FIGURE 7
